# Supplementary material
Source: publisher figshare collection journal article supplement (https://asha.figshare.com/articles/dataset/_/23817495)
Supplement: Supplementary file 1 [file 1]

**Supplemental Material S3.** Ratings of measurement properties and risk of bias for individual studies of theory of mind assessment measurement properties.

| Assessment                        | Citation                                        | Methodological Quality/Rating of Sufficiency of the Measurement Property |                         |                           |             |                      |                         |                                                   |
|-----------------------------------|-------------------------------------------------|--------------------------------------------------------------------------|-------------------------|---------------------------|-------------|----------------------|-------------------------|---------------------------------------------------|
|                                   |                                                 | Structural<br>Validity                                                   | Internal<br>Consistency | Measurement<br>Invariance | Reliability | Measurement<br>Error | Criterion<br>Validity   | Hypothesis<br>Testing                             |
| IRI                               | Davis, 1980                                     | V ?                                                                      | V +                     | NR                        | A ?         | NR                   | NR                      | NR                                                |
|                                   | Davis, 1983                                     | NR                                                                       | NR                      | NR                        | NR          | NR                   | NR                      | V +<br>V - <sup>1</sup>                           |
|                                   | Melchers et al., 2015                           | NR                                                                       | V +<br>V - <sup>1</sup> | NR                        | NR          | NR                   | NR                      | Convergent<br>V+<br>V- <sup>1</sup><br>Convergent |
| MASC                              | Fossati et al., 2017                            | A +<br>(adolescent)<br>A - (adult)                                       | V +                     | NR                        | NR          | NR                   | NR                      | V +<br>Convergent                                 |
|                                   | Lahera et al., 2014                             | NR                                                                       | V +                     | NR                        | I ?         | NR                   | V +                     | V +<br>Convergent                                 |
|                                   | Martinez et al, 2017                            | NR                                                                       | V +                     | NR                        | NR          | NR                   | V +                     | NR                                                |
|                                   | Muller et al., 2016                             | I ?                                                                      | V +                     | NR                        | NR          | NR                   | V +                     | V +<br>Convergent                                 |
| NEPSY II<br>Affect<br>Recognition | Korkman et al., 2007                            | NR                                                                       | D ?                     | NR                        | A ?         | I ?                  | NR                      | V + Group<br>Differences                          |
| NEPSY II<br>Theory of<br>Mind     | Korkman et al., 2007<br>Internal<br>Consistency | NR                                                                       | D ?                     | NR                        | A ?         | I ?                  | V -<br>V + <sup>2</sup> | V + Group<br>Differences                          |

| Assessment                  | Citation                                                            | Methodological Quality/Rating of Sufficiency of the Measurement Property |                               |                                |             |                   |                    |                                   |
|-----------------------------|---------------------------------------------------------------------|--------------------------------------------------------------------------|-------------------------------|--------------------------------|-------------|-------------------|--------------------|-----------------------------------|
|                             |                                                                     | Structural Validity                                                      | Internal Consistency          | Measurement Invariance         | Reliability | Measurement Error | Criterion Validity | Hypothesis Testing                |
|                             | McKown et al., 2013                                                 | NR                                                                       | D ?                           | NR                             | D ?         | NR                | NR                 | V + Convergent                    |
| 6-Step Theory of Mind Scale | Peterson et al., 2012                                               | NR                                                                       | NR                            | NR                             | NR          | NR                | NR                 | V + Convergent                    |
| TASIT                       | Mathersul et al., 2013                                              | NR                                                                       | NR                            | NR                             | NR          | NR                | NR                 | V + Group Differences             |
|                             | McDonald, Flanagan & Rollins, 2017 <sup>3</sup>                     | NR                                                                       | D ?                           | NR                             | A ?         | NR                | NR                 | NR                                |
|                             | Morrison et al., 2019                                               | NR                                                                       | D ?                           | NR                             | NR          | NR                | NR                 | V + Group Difference & Convergent |
| TASIT-S                     | McDonald et al., 2018                                               | NR                                                                       | NR                            | I + (Part 1,2)<br>I – (Part 3) | NR          | NR                | NR                 | NR                                |
|                             | McDonald, Flanagan & Honan, 2017; Honan et al., 2016 (same studies) | V +                                                                      | I ? (Part 1)<br>V+ (Part 2,3) | NR                             | NR          | NR                | NR                 | V + Convergent                    |

| Assessment | Citation                               | Methodological Quality/Rating of Sufficiency of the Measurement Property |                      |                        |                        |                   |                    |                                                         |
|------------|----------------------------------------|--------------------------------------------------------------------------|----------------------|------------------------|------------------------|-------------------|--------------------|---------------------------------------------------------|
|            |                                        | Structural Validity                                                      | Internal Consistency | Measurement Invariance | Reliability            | Measurement Error | Criterion Validity | Hypothesis Testing                                      |
| ToMI-2     | Greenslade & Coggins, 2016             | NR                                                                       | I ? <sup>4</sup>     | NR                     | NR                     | NR                | NR                 | V + Group Difference & Convergent V + Group Differences |
|            | Hutchins et al., 2016 (First 42 Items) | I ?                                                                      | I ? <sup>4</sup>     | NR                     | A ?                    | V ?               | V +                |                                                         |
|            | Hutchins et al., 2016 (All Items)      | NR                                                                       | I ? <sup>4</sup>     | NR                     | NR                     | V ?               | NR                 | NR                                                      |
|            | Jiang et al., 2016                     | NR                                                                       | I ? <sup>4</sup>     | NR                     | D +                    | NR                | NR                 | NR                                                      |
|            | Lee et al., 2021                       | I +                                                                      | NR                   | NR                     | NR                     | NR                | NR                 | NR                                                      |
|            | Pujals et al., 2016                    | NR                                                                       | I ? <sup>4</sup>     | NR                     | NR                     | NR                | NR                 | V + Group Differences                                   |
| ToMI-SR-A  | Crehan et al., 2021                    | NR                                                                       | NR                   | NR                     | NR                     | NR                | NR                 | V + Group Difference & Convergent V + Group Differences |
|            | Hutchins et al., 2019 <sup>5</sup>     | I ?                                                                      | V +                  | NR                     | NR                     | NR                | V +                | V + Group Differences                                   |
|            | Hutchins et al., 2021 <sup>5</sup>     | I ?                                                                      | V +                  | NR                     | NR                     | NR                | V +                | V + Group Differences                                   |
| ToMTB      | Hutchins et al., 2008                  | NR                                                                       | D ?                  | NR                     | V +<br>V – (six items) | NR                | NR                 | NR                                                      |

| Assessment | Citation              | Methodological Quality/Rating of Sufficiency of the Measurement Property |                      |                        |             |                   |                    |                    |
|------------|-----------------------|--------------------------------------------------------------------------|----------------------|------------------------|-------------|-------------------|--------------------|--------------------|
|            |                       | Structural Validity                                                      | Internal Consistency | Measurement Invariance | Reliability | Measurement Error | Criterion Validity | Hypothesis Testing |
|            | Hutchins et al., 2010 | NR                                                                       | D ?                  | NR                     | NR          | NR                | NR                 | V +<br>Convergent  |

*Notes:* Methodological quality rated V = very good, A = adequate, D = doubtful, or I = inadequate based on COSMIN risk of bias process. Ratings of measurement property sufficiency are + for sufficient, - for insufficient, or ? for indeterminate. NR = not rated in the study. <sup>1</sup> IRI internal consistency and convergent validity rated - for personal distress subscale only. <sup>2</sup> NEPSY II Theory of mind scale reported to have sufficient specificity but insufficient sensitivity to identify children with ASD. <sup>3</sup> Measurement properties based on sample including people with schizophrenia. <sup>4</sup> Internal consistency calculated for all items rather than for each set of unidimensional items. <sup>5</sup> Hutchins et al., (2019; manual) and Hutchins et al., (2021) appear to report the same studies.
