# Supplementary material
Source: publisher figshare collection journal article supplement (https://asha.figshare.com/articles/dataset/_/23817495)
Supplement: Supplementary file 3 [file 1]

## Supplemental Material S1. Search strategy for PubMed.

| Construct      | Search Strategy                                                                                                                                                                                                                                                                                                                                                                                                                                                                                                                                                                                                                                                                                                                                                                                                                                                                                                                                                                                                                                                                                                                                                                                                                                                                                                                                                                                                                                                                                                                                                                                                                                                                                                                                                                                                                                                        |
|----------------|------------------------------------------------------------------------------------------------------------------------------------------------------------------------------------------------------------------------------------------------------------------------------------------------------------------------------------------------------------------------------------------------------------------------------------------------------------------------------------------------------------------------------------------------------------------------------------------------------------------------------------------------------------------------------------------------------------------------------------------------------------------------------------------------------------------------------------------------------------------------------------------------------------------------------------------------------------------------------------------------------------------------------------------------------------------------------------------------------------------------------------------------------------------------------------------------------------------------------------------------------------------------------------------------------------------------------------------------------------------------------------------------------------------------------------------------------------------------------------------------------------------------------------------------------------------------------------------------------------------------------------------------------------------------------------------------------------------------------------------------------------------------------------------------------------------------------------------------------------------------|
| Theory of Mind | <p>"Advanced Theory of Mind" [tiab] OR "Mentalizing" [tiab] OR "Mentalising" [tiab] OR "false belief*" [tiab] OR "Theory of Mind" [tiab] OR "TOM" [tiab] OR "emotion recognition" [tiab] OR "mental state recognition" [tiab] OR "perspective taking" [tiab] OR "mind reading" [tiab] OR "mind-reading" [tiab] OR "emotion recognition" [tiab] OR "faux pas" [tiab] OR "faux pas recognition" [tiab] OR "cognitive empathy" [tiab] OR "mindreading" [tiab] OR "sarcasm" [tiab] OR "irony" [tiab] OR "bluff" [tiab] OR "double-bluff" [tiab] OR "Alexithymia" [tiab] OR "Intrapersonal ToM" [tiab] OR "metarepresentation*" [tiab] OR "meta representation*" [tiab] OR "self-perception" [tiab] OR "self-awareness" [tiab] OR "affective empathy" [tiab] OR "cognitive affective" [tiab] OR "interpersonal affective" [tiab] OR "Affective ToM" [tiab] OR "affective theory of mind" [tiab] OR "Theory of Mind" [MeSH] OR "Mentalization" [MeSH] OR "Social Perception" [MeSH] OR "Social Cognition" [MeSH] OR "Empathy" [MeSH] OR "Social Behavior" [Mesh:NoExp] OR "Personal Construct Theory" [MeSH] NOT "metacognition" [tiab] NOT "metacognitive" [tiab]</p>                                                                                                                                                                                                                                                                                                                                                                                                                                                                                                                                                                                                                                                                                                       |
| Age            | <p>"Adolescent*" [tiab] OR "Teen*" [tiab] OR "Youth*" [tiab] OR "Young adult*" [tiab] OR "Child" [tiab] OR "adult" [tiab] OR "adults" [tiab] OR "adolescence" [tiab] OR "juvenile" [tiab] OR "transition" [tiab] OR "teen" [tiab] OR "teenage*" [tiab] OR "ninth grade*" [tiab] OR "tenth grade*" [tiab] OR "eleventh grade*" [tiab] OR "twelfth grade*" [tiab] OR "young adulthood" [tiab] OR "neurodevelopmental" [tiab] OR "kindergarten" [tiab] OR "first grade*" [tiab] OR "second grade*" [tiab] OR "third grade*" [tiab] OR "fourth grade*" [tiab] OR "fifth grade*" [tiab] OR "sixth grade*" [tiab] OR "seventh grade*" [tiab] OR "eighth grade*" [tiab] OR "transition*" [tiab] OR "children" [tiab] OR "child" [tiab] OR "five-year-old*" [tiab] OR "six-year-old*" [tiab] OR "seven-year-old*" [tiab] OR "eight-year-old*" [tiab] OR "nine-year-old*" [tiab] OR "ten-year-old*" [tiab] OR "eleven-year-old*" [tiab] OR "twelve-year-old*" [tiab] OR "thirteen-year-old*" [tiab] OR "fourteen-year-old*" [tiab] OR "fifteen-year-old*" [tiab] OR "sixteen-year-old*" [tiab] OR "seventeen-year-old*" [tiab] OR "eighteen-year-old*" [tiab] OR "nineteen-year-old*" [tiab] OR "twenty-year-old*" [tiab] OR "twenty-one-year-old*" [tiab] OR "5 year old*" [tiab] OR "6 year old*" [tiab] OR "7 year old*" [tiab] OR "8 year old*" [tiab] OR "9 year old*" [tiab] OR "10 year old*" [tiab] OR "11 year old*" [tiab] OR "12 year old*" [tiab] OR "13 year old*" [tiab] OR "14 year old*" [tiab] OR "15 year old*" [tiab] OR "16 year old*" [tiab] OR "17 year old*" [tiab] OR "18 year old*" [tiab] OR "19 year old*" [tiab] OR "20 year old*" [tiab] OR "21 year old*" [tiab] OR "Child" [MeSH] OR "Adolescent" [MeSH] OR "Young Adult" [MeSH] OR "Adult" [Mesh:NoExp] NOT "infant" [tiab] NOT "Aged" [MeSH] NOT "elderly" [tiab] NOT "Middle Aged" [MeSH]</p> |

**Measurement Properties** Search filter for PubMed adopted from Terwee, Jansma, Riphagen, & de Vet, 2009.

**Instruments** questionnaire\*[tiab] OR scale\*[tiab] OR inventor\*[tiab] OR instrument\*[tiab] OR measure\*[tiab] OR tool [tiab] OR assess\*[tiab] OR evaluation\*[tiab] OF test\*[tiab]

**Construct Search Strategy**

**Populations** "Kanner's Syndrome" [tiab] OR "Autism" [tiab] OR "Autistic" [tiab] OR "Autistic Spectrum Disorders" [tiab] OR "Autistic Spectrum Disorder\*" [tiab] OR "Asperger's Syndrome\*" [tiab] OR "Aspergers Syndrome" [tiab] OR "Asperger Disease\*" [tiab] OR "Asperger's Disease\*" [tiab] OR "Asperger Disorder\*" [tiab] OR "Aspergers Disorder\*" [tiab] OR "Asperger's Disorder\*" [tiab] OR "Rett Disorder" [tiab] OR "Rett's Disorder" [tiab] OR "Rett Syndrome" [tiab] OR "Rett's Syndrome" [tiab] OR "Retts Syndrome" [tiab] OR "ASD" [tiab] OR "Autistic" [tiab] OR "High-Functioning Autism" [tiab] OR "High Functioning Autism" [tiab] OR "HFA" [tiab] OR "Fragile X Syndromes" [tiab] OR "Marker X Syndrome\*" [tiab] OR "Martin Bell Syndrome" [tiab] OR "Martin-Bell Syndrome" [tiab] OR "Mongolism" [tiab] OR "Down's Syndrome" [tiab] OR "Downs Syndrome" [tiab] OR "Trisomy 21" [tiab] OR "Specific Language Disorders" [tiab] OR "Specific Language Impairment\*" [tiab] OR "Language Disorder" [tiab] OR "Language Development Disorder\*" [tiab] OR "Language Development Disorder\*" [tiab] OR "Speech Delay\*" [tiab] OR "Language Delay\*" [tiab] OR "Semantic Pragmatic Disorder\*" [tiab] OR "Semantic-Pragmatic Disorder\*" [tiab] OR "Auditory Processing Disorder\*" [tiab] OR "Central Auditory Processing Disorder" [tiab] OR "Primary language impairment" [tiab] OR "Social Communication Disorder\*" [tiab] OR "Pragmatic Communication Disorder\*" [tiab] OR "Typical development" [tiab] OR "Typically developing" [tiab] OR "TD" [tiab] OR "Language learning disabilit\*" [tiab] OR "LLD" [tiab] OR "Dyslexias" [tiab] OR "Word Blindness\*" [tiab] OR "Reading Disorder\*" [tiab] OR "Developmental Reading Disorder\*" [tiab] OR "Developmental Dyslexia\*" [tiab] OR "Alexia\*" [tiab] OR "Reading Disabilit\*" [tiab] OR "Acquired Dyslexia\*" [tiab] OR "Acquired Reading Disorder\*" [tiab] OR "Reading Disabilit\*" [tiab] OR "Auditory Perceptual Disorder" [tiab] OR "Auditory Processing Disorder" [tiab] OR "Auditory Comprehension Disorder\*" [tiab] OR "Auditory Inattention\*" [tiab] OR "Specific Learning Disorder" [tiab] OR "Learning Disabilit\*" [tiab] OR "Learning Disturbance\*" [tiab] OR "Learning Disorder\*" [tiab] OR "Adult Learning Disabilit\*" OR "Adult Learning Disorder\*" [tiab] OR "Developmental Disorders of Scholastic Skills" [tiab] OR "Intellectual Disabilit\*" [tiab] OR "Intellectual Development Disorder\*" [tiab] OR "Mental Retardation" [tiab] OR "Idiocy" [tiab] OR "Psychosocial Mental Retardation\*" [tiab] OR "Mental Deficienc\*" [tiab] OR "Attention Deficit Disorders with Hyperactivity" [tiab] OR "Attention Deficit Hyperactivity Disorders" [tiab] OR "Attention Deficit-Hyperactivity Disorder\*" [tiab] OR "Hyperkinetic

Syndrome" [tiab] OR "ADDH" [tiab] OR "Attention Deficit Hyperactivity Disorder" [tiab] OR "Attention Deficit Disorder\*" [tiab] OR "Minimal Brain Dysfunction" [tiab] OR "ADD" [tiab] OR "ADHD" [tiab] OR "Emotional and behavioral disorder\*" [tiab] OR "EBD" [tiab] OR "Complete Hearing Loss" [tiab] OR "Extreme Hearing Loss" [tiab] OR "Prelingual Deafness" [tiab] OR "Acquired Deafness" [tiab] OR "Hearing Loss Permanent" [tiab] OR "Deaf Mutism" [tiab] OR "Deaf-Mutism" [tiab] OR "normal developing" [tiab] OR "normally developing" [tiab] OR "Autistic Disorder" [MeSH] OR "Autism Spectrum Disorder" [MeSH] OR "Asperger Syndrome" [MeSH] OR "Child Development Disorders, Pervasive" [MeSH] OR "Rett Syndrome" [MeSH] OR "Fragile X Syndrome" [MeSH] OR "Down Syndrome" [MeSH] OR "Specific Language Disorder" [MeSH] OR "Language Disorders" [MeSH] OR "Language Development Disorders" [MeSH] OR "Social Communication Disorder" [MeSH] OR "Dyslexia" [MeSH] OR "Auditory Perceptual Disorders" [MeSH] OR "Learning Disabilities" [MeSH] OR "Intellectual Disability" [MeSH] OR "Attention Deficit Disorder with Hyperactivity" [MeSH] OR "Deafness" [MeSH] NOT "Apraxias" [MeSH] NOT "Apraxia, Ideomotor" [MeSH]
